**Title: Auxin-mediated rapid degradation of selective proteins in hippocampal neurons**

**Authors:** Risako Nakano<sup>1</sup>, Naoki Ihara<sup>1</sup>, Shota Morikawa<sup>1</sup>, Ai Nakashima<sup>1</sup>, Masato T. Kanemaki<sup>2</sup>, Yuji Ikegaya<sup>1,3</sup>, and Haruki Takeuchi<sup>1,4\*</sup>

<sup>1</sup>Laboratory of Chemical Pharmacology, Graduate School of Pharmaceutical Sciences, The University of Tokyo, Tokyo 113-0033, Japan

<sup>2</sup>Molecular Cell Engineering Laboratory, National Institute of Genetics, Research Organization of Information and Systems (ROIS), and Department of Genetics, The Graduate University for Advanced Studies (SOKENDAI), Yata 1111, Mishima, Shizuoka 411-8540, Japan

<sup>3</sup>Center for Information and Neural Networks, National Institute of Information and Communications Technology, Suita City, Osaka 565-0871, Japan

<sup>4</sup>Social Cooperation Program of evolutionary chemical safety assessment system, LECSAS, Graduate School of Pharmaceutical Sciences, The University of Tokyo, Tokyo 113-0033, Japan

\*Email: [haruki-t@mol.f.u-tokyo.ac.jp](mailto:haruki-t@mol.f.u-tokyo.ac.jp)

**Corresponding author:** Haruki Takeuchi Ph.D.

Social Cooperation Program of evolutionary chemical safety assessment system, LECSAS, Graduate School of Pharmaceutical Sciences, The University of Tokyo, Tokyo 113-0033, Japan

Japan Phone No: 81-3-5841-4784

Fax No: 81-3-5841-4786

[haruki-t@mol.f.u-tokyo.ac.jp](mailto:haruki-t@mol.f.u-tokyo.ac.jp),

**Running title: Development of rapid protein degradation system in neurons**

**Conflict of interest: none declared**

**22 pages, 3 figures**

**982(138), 2299(343), 15474(2294) characters(words) for abstract, introduction, and the main body text, respectively.**

1 **Abstract**

2 **Genetic manipulation of protein levels is a promising approach to**  
3 **identify the function of a specific protein in living organisms. Previous**  
4 **studies demonstrated that the auxin-inducible degron (AID) strategy**  
5 **provides rapid and reversible degradation of various proteins in fungi**  
6 **and mammalian mitotic cells. In this study, we employed this**  
7 **technology to postmitotic neurons to address whether the AID system**  
8 **could be applied to the nervous system. Using adeno-associated**  
9 **viruses, we simultaneously introduced EGFP fused with an AID tag,**  
10 **and an F-box family protein, TIR1 from *Oryza sativa* (OsTIR1) into**  
11 **hippocampal neurons. In dissociated hippocampal neurons, EGFP**  
12 **fluorescence signals rapidly decreased when adding a plant hormone,**  
13 **auxin. Further, auxin-induced EGFP degradation was also observed**  
14 **in hippocampal acute slices. Taken together, these results open the**  
15 **door for neuroscientists to manipulate protein expression levels by the**  
16 **AID-system in a temporally-controlled manner.**

17 **Keywords**

18 **auxin-inducible degron, rapid protein degradation, ubiquitin-proteasome system,**

19 **neurons**

## 20 **Introduction**

21           Conditional manipulation of the protein expression level is indispensable for  
22 understanding not only the function of specific proteins, but also complex biological  
23 systems. Various methods have been developed to regulate the expression level of  
24 specific proteins at the level of transcription or translation [1-3]. General approaches to  
25 control the protein level are the disruption of DNA sequence coding for a specific  
26 protein by gene editing and suppression of mRNA level by RNA interference [4-7].  
27 However, as these methods deplete proteins in an indirect way, their temporal  
28 specificities heavily rely on the stability of the target proteins.

29           To achieve precise temporal control of protein expression, a variety of  
30 systems have been invented that target posttranslational protein degradation using  
31 cell-permeable small molecules [8-13]. The auxin-inducible degron (AID) system has  
32 been developed by modifying a plant-specific ubiquitin-proteasome pathway [14].  
33 Skp1-Cullin-F-Box protein (SCF) complex catalyzes polyubiquitination of proteins  
34 destined for degradation by the 26S proteasome. The SCF complex is composed of the  
35 core CUL1-RING complex and an F-box substrate-recognition subunit. Although the  
36 SCF complex is highly conserved across species, a type of F-Box protein determines

37 the specificity of substrate recruited to the SCF complex. TIR1 is an F-box protein that  
38 is only preserved within plant species and recognizes a degron sequence (hereafter  
39 called the AID tag) conserved in the AUX/IAA family proteins only in the presence of  
40 phytohormone auxin for degradation via the ubiquitin-proteasome pathway [15-17].  
41 The AID system has been developed by introducing two components, the  
42 plant-specific TIR1 and the AID tag, the latter of which is fused with a protein of  
43 interest to promote the degradation of AID-tagged proteins through the binding of  
44 TIR1. To date, the AID system has been employed for conditional ablation of specific  
45 proteins in a variety of cells [14, 18-20]. Previous studies demonstrated that the AID  
46 system achieves not only conditional, but also rapid degradation of target proteins on a  
47 time scale of several ten minutes [14, 18, 21]. In this study, we examined whether the  
48 AID system can be used for manipulating specific protein levels in the nervous system.

## 49 **Materials and methods**

### 50 **Animals**

51 All experimental procedures were performed with the approval of the animal  
52 experiment ethics committee of the University of Tokyo (approval number: P29-15,  
53 and in accordance with the guidelines for the care and use of laboratory animals of the  
54 University of Tokyo. C57BL/6J mice were purchased from Japan SLC (Shizuoka,  
55 Japan).

### 56 **DNA construction and AAV vector production**

57 Adeno-associated virus (AAV) vector was generated as described previously  
58 [22]. pAAV-hSyn-OsTIR1-P2A-mAID-EGFP construct was synthesized by replacing  
59 coding region of the pAAV-hSyn-EGFP (Addgene plasmid #50465) with the  
60 OsTIR1-P2A-mAID-EGFP-NES sequence OsTIR1-p2A-mAID-EGFP-NES sequence  
61 was amplified by PCR from pAY8 using following primers; 5'  
62 GGATCCGCCACCATGACATACTTTCCTGAAGAGGTCGTC 3' and 5'  
63 GCTTTGTACGGAATTGGGAGGTGTGGGAGGAGGTTTT 3'. The PCR product

64 was subcloned into the NcoI and EcoRI sites of the pAAV-hSyn-EGFP. HEK293T  
65 cells were transfected with the pAAV-hSyn-OsTIR1-P2A-mAID-EGFP and two AAV  
66 helper plasmids encoding serotype DJ (Cell Biolabs, San Diego, CA, USA) using  
67 polyethylenimine (Polysciences, Warrington, PA, USA). Three days after  
68 transfection, AAVs were collected from HEK293T cells and purified using AAVpro  
69 Purification Kit (Takara Bio, Shiga, Japan) according to the manufacturer's protocol.  
70 The AAV titer was determined to be  $4.8 \times 10^{13}$  vg/ml by real-time PCR using ITR2  
71 primers [23].

## 72 **Primary culture of hippocampal neuronal cells**

73 Dissociated hippocampal neurons were prepared from postnatal day (PD) 0  
74 C57BL/6J mice as previously described [24]. Mice were anesthetized by hypothermia  
75 and quickly decapitated. Hippocampal tissue was dissected and minced in pre-warmed  
76 Hank's Balanced Salt Solution (HBSS) and treated with 0.25% Trypsin/EDTA at 37  
77 °C. After 15 min of incubation, the tissue was treated with DNaseI (Sigma-Aldrich, St  
78 Louis, Missouri, USA) at room temperature (RT) for 5 min and washed with HBSS  
79 three times. HBSS was replaced with Neurobasal plating medium [Neurobasal



80 Medium containing B27 Supplement (1:50), 0.5 mM Glutamine Solution, 25  $\mu$ M  
81 Glutamate, Penicillin/Streptomycin (1:200), 1 mM HEPES, 10% horse serum  
82 (heat-inactivated and filter-sterilized, Gibco, Inc., Grand Island, NY, USA)]. Tissue  
83 was triturated using fire-polished Pasteur pipettes and filtered through a 40- $\mu$ m-pore  
84 cell strainer (Corning, New York City, NY, USA). Hippocampal cells were plated on  
85 poly-D-Lysine coated glass base dishes (35 mmf with a window of 12 mmf, 0.15 mm  
86 thick glass; IWAKI) at a density of  $8.0 \times 10^4$  cells/well, and placed in a 37 °C, 5% CO<sub>2</sub>  
87 incubator. At 1 day *in vitro* (DIV), Neurobasal plating medium was replaced with  
88 Neurobasal feeding medium (Neurobasal Medium containing B27 Supplement (1:50),  
89 0.5 mM Glutamate Solution, Penicillin/Streptomycin (1:200), 1 mM HEPES). At 2  
90 DIV, the medium was replaced with fresh feeding medium containing a final  
91 concentration of 5  $\mu$ M cytosine  $\beta$ -D-arabinofuranoside (AraC; Sigma-Aldrich) for 24  
92 hours to inhibit the growth of non-neuronal cells. The medium was replaced with fresh  
93 feeding medium 24 hours after adding AraC. After 3 DIV, half of the Neurobasal  
94 medium was replaced with fresh Neurobasal feeding medium every 4 days. 1  $\mu$ l of the  
95 diluted AAV ( $4.8 \times 10^{12}$  vg/ml) was dropped into the culture at 7 DIV and the  
96 degradation assay was performed at 13 or 14 DIV.

97 **Hippocampal acute slice preparation**

98           Adult mice were anesthetized by isoflurane and fixed in a stereotaxic frame.  
99           The skull was exposed and a glass micropipette containing the AAV was inserted to  
100          dentate gyrus (AP = -2 mm; ML = +1.3 mm; DV = -2.05 mm). 500 nl of AAV was  
101          injected at 50 nl per min using a syringe pump (KD Scientific, Tokyo, Japan). 3 weeks  
102          after the AAV injection, a posterior brain block was cut into 300- $\mu$ m thick coronal  
103          slices using a Vibratome VT1200S (Leica Microsystems, Wetzlar, Germany) in  
104          ice-cold oxygenated artificial cerebrospinal fluid (aCSF: 124 mM NaCl, 2.5mM KCl,  
105          1.2 mM NaH<sub>2</sub>PO<sub>4</sub>, 24 mM NaHCO<sub>3</sub>, 5 mM HEPES, 13 mM glucose, 2 mM CaCl<sub>2</sub>.  
106          Slices were briefly transferred to an interface chamber containing oxygenated aCSF at  
107          RT. Slices were placed onto 35 mm glass base dish filled with Neurobasal feeding  
108          medium during the degradation assay.

109 **Immunocytochemistry**

110           Cells were fixed in 4% paraformaldehyde in PBS for 10 min at RT. After  
111          fixation, cells were incubated in PBS containing 0.1% Triton X-100 for 15 min at RT.  
112          After washing twice with PBS, cells were blocked in a solution of PBS containing 5%

113 normal donkey serum for 30 min at RT. Primary antibodies used are as follows: mouse  
114 anti-Tuj1 antibodies (Covance, 1:1,000); chicken anti-GFP antibodies (Abcam,  
115 1:1,000). Fluorescent images of immunostained samples were obtained using a  
116 BZ-X700 microscope (Keyence, Osaka, Japan).

#### 117 **Data acquisition and statistical analysis**

118 Images were acquired using an FV1200 scanning confocal microscope  
119 (Olympus, Tokyo, Japan) equipped with diode lasers. For imaging primary culture,  
120 Z-series images (7 optical sections) were acquired with a 10 × water immersion  
121 objective lens (0.40 numerical aperture, Olympus). For imaging acute slice, Z-series  
122 images (5 optical sections) were acquired with a 20 × water immersion objective lens.  
123 GFP signal intensities within soma were measured with ImageJ (NIH, Bethesda, MD,  
124 USA). After subtracting background signals, signal intensity at each time point was  
125 normalized to the data at 10 min (100%). Statistical analyses were performed with  
126 OriginPro (OriginLab) software.

127 **IAA treatment**

128 IAA (indole-3-acetic acid sodium salt, Sigma-Aldrich) was diluted in  
129 Neurobasal feeding medium to make 0.5 M stock solution. Pre-warmed IAA solution  
130 was applied in hippocampal neuronal cells and acute slice in a final concentration of  
131 0.5 mM.

132 **Results**

133 To test whether the AID system could be applicable in the nervous system, we  
134 initially used primary dissociated neurons. To avoid spontaneous basal degradation of  
135 degron-fused proteins suggested by a recent report [25], we cultured hippocampal  
136 neurons in culture media without serum. Two components, TIR1 from *Oryza sativa*  
137 (*OsTIR1*) and proteins fused with a mini-AID tag (*mAID*), were introduced into  
138 neurons by AAV viral vector infection. We generated AAV-DJ carrying *OsTIR1* and  
139 *EGFP* fused with *mAID* (pAAV-hSyn-*OsTIR1*-P2A-*mAID*-*EGFP*). Leucine-rich  
140 nuclear export signal (NES) sequence was also attached to the C-terminus region of  
141 *EGFP* to promote translocation of *EGFP* proteins into the cytoplasm. P2A peptide

142 coding sequence was inserted into the middle of *OsTIR1* and *mAID-EGFP* to achieve  
143 simultaneous expression of these proteins (Fig. 1A). AAV-DJ containing solution ( $4.8$   
144  $\times 10^{13}$  vg/ml) was applied to dissociated hippocampal neurons prepared from PD0  
145 pups (See Methods for details). Immunocytochemistry with antibodies against GFP  
146 and Tuj1 (a neuronal marker), revealed that mAID-EGFP proteins were present across  
147 the entire cytoplasm and that ectopic expression of mAID-EGFP proteins did not affect  
148 the morphology of the dissociated neurons (Fig. 1B).

149 We then tested whether degradation of mAID-fused protein in dissociated  
150 neurons was triggered by application of indole-3-acetic acid (IAA). Dissociated  
151 hippocampal neurons prepared from PD0 pups were infected by the AAV-DJ carrying  
152 *OsTIR1* and *mAID-EGFP* at 7 days *in vitro* (7 DIV). One week after AAV infection  
153 (13-14 DIV), EGFP fluorescent intensities were quantified with fluorescence  
154 time-lapse imaging after IAA treatment to analyze the kinetics of protein degradation  
155 (Fig. 2A). We found that EGFP fluorescence dropped over time (Fig. 2B) and showed  
156 the weakest signal intensity 90 min after IAA application (Figs. 2C and D,  $n = 30$  and  
157 38 cells for EGFP and mAID-EGFP, respectively.  $***p < 0.001$ , Student's *t*-test). In  
158 contrast, fluorescent signals from EGFP without mAID did not decrease upon IAA  
159 treatment. This result indicated that auxin-induced degradation of mAID-fused proteins

160 occurred in *in vitro* dissociated hippocampal neurons.

161           We then tested whether the auxin-induced protein degradation occurs in the  
162 acute brain slices. We injected the AAV-OsTIR1-P2A-mAID-EGFP into the dentate  
163 gyrus of mice (Fig. 3A) and conducted protein degradation assay 3 weeks after AAV  
164 infection. Acute brain slices containing dentate gyrus were prepared and EGFP  
165 fluorescence signal intensities in hippocampal neurons with (+) or without (-) IAA  
166 treatment were measured by time-lapse imaging using confocal microscopy (Figs. 3B  
167 and C). We found that EGFP fluorescence decreased to about 50% of its initial value  
168 within 120 min after IAA application (Figs. 3C and D, n = 5 cells per group.  $**p <$   
169 0.01, Student's *t*-test). This result implies that the AID system is partially working.

## 170 **Discussion**

171           In the present study, we examined whether conditional protein degradation  
172 with the AID system can be transferable to the central nervous system. By time-lapse  
173 imaging of EGFP fluorescence, we concluded that auxin-inducible degradation of  
174 mAID-tagged proteins occurred in primary culture and acute slice conditions.

175 However, it should be noted that the efficiency and the rate of degradation were not  
176 comparable to those observed in other cell lines [18, 21]. Why is the AID system only  
177 partially working in neurons? One explanation is that the N-terminus fusion of mAID  
178 to EGFP was not suitable for efficient protein degradation. It might be possible that  
179 protein degradation occurs more efficiently and quickly if mAID was fused to the  
180 C-terminus region of the proteins. Another explanation is that the rate of protein  
181 synthesis was much higher than that of degradation induced by auxin. Because  
182 expression levels of virally-induced proteins are thought to be much higher than those  
183 of endogenous proteins, it is possible that virally-induced mAID-EGFP production  
184 overwhelmed protein degradation induced by auxin. It would be interesting to test the  
185 AID system combined with a knock-in approach to achieve physiological expression  
186 levels of mAID-fused proteins. Conditional and reversible control of specific proteins  
187 is desirable to elucidate brain functions. Further improvement in the AID system  
188 would provide powerful tools to investigate protein functions in the field of  
189 neuroscience.

190 **Acknowledgments**

191           This work was supported by the Takeda Science Foundation, the Japan  
192   Foundation for Applied Enzymology, the Kato Memorial Bioscience Foundation, and  
193   the JSPS KAKENHI Grant Number 24370087, 15K21029, 18K14712. We appreciate  
194   Mr. Stuart Wax for his advice in the writing of this paper.

195 **Abbreviations**

196           AID, auxin-inducible degron; EGFP, enhanced green fluorescent protein; SCF  
197   complex, Skp1-Cullin-F-Box protein complex; AAV, adeno-associated virus; DIV,  
198   day *in vitro*; IAA, indole-3-acetic acid sodium salt



199 **LEGENDS**

200 **Figure 1. An auxin-inducible degron system for rapid protein depletion in**  
201 **neurons.**

202 **(A)** Schematic drawings of AAV vector for a protein degradation assay using the AID  
203 system (top). Virally expressed TIR1 proteins are incorporated into SCF complex  
204 (bottom left). In the presence of auxin, TIR1 interacts with AID-fused target proteins  
205 and promotes polyubiquitination by the E2 ligase (bottom middle). Ubiquitinated  
206 target proteins are rapidly degraded by the 26S proteasome (bottom right). **(B)**  
207 Transduction of dissociated hippocampal cells by the AID-fused EGFP. Hippocampal  
208 cultures transduced with AAV-hSyn-OsTIR1-P2A-mAID-EGFP vector were  
209 immunostained using antibodies against GFP and Tuj1 (a neuronal marker). Scale bars,  
210 50  $\mu\text{m}$ .

211 **Figure 2. Auxin-induced protein degradation in dissociated hippocampal neurons.**

212 **(A)** Experimental paradigm for the protein degradation assay in dissociated neurons.  
213 Dissociated hippocampal neurons were infected with  
214 AAV-hSyn-OsTIR1-P2A-mAID-EGFP or AAV-hSyn-EGFP vector at 7 DIV and the  
215 degradation assay was performed at 13 or 14 DIV. **(B)** Representative images of  
216 mAID-EGFP expressing dissociated hippocampal neurons before and after IAA  
217 treatment. GFP fluorescence decreased upon IAA treatment. Scale bar, 50  $\mu$ m. **(C)**  
218 Signal intensities of GFP in hippocampal neurons were quantified and plotted with the  
219 10 min time point sample as 100%. Open circles indicate EGFP and filled circles  
220 indicate mAID-EGFP. **(D)** Signal intensities of EGFP in dissociated hippocampal  
221 neurons 90 min after IAA application. Error bars indicate the SEM.  $n = 30$  and  $38$  cells  
222 for EGFP and mAID-EGFP, respectively.  $***p < 0.001$ , Student's  $t$ -test.

223 **Figure 3. Auxin-induced protein degradation in acute brain slices.**

224 **(A)** AAV-hSyn-OsTIR1-P2A-mAID-EGFP vector was injected into dentate gyrus and  
225 the degradation assay was performed 3 weeks after the injection. Expression of EGFP  
226 in a coronal hippocampal section from the AAV-infected mouse. Scale bar, 20  $\mu\text{m}$ .  
227 DG, dentate gyrus. **(B)** Representative images of mAID-EGFP expressing  
228 hippocampal neurons before and after IAA treatment. GFP fluorescence decreased  
229 upon IAA treatment. Neurons are demarked by dashed lines. Scale bar, 10  $\mu\text{m}$ . **(C)**  
230 Signal intensities of mAID-EGFP in hippocampal neurons were quantified and plotted  
231 with the 0 min time point sample as 100%. **(D)** Signal intensities of GFP in  
232 hippocampal neurons 120 min after IAA application. Error bars indicate the SEM. n =  
233 5 cells per group.  $**p < 0.01$ , Student's *t*-test.

## References

1. Capecchi MR: **Gene targeting in mice: functional analysis of the mammalian genome for the twenty-first century.** *Nature reviews Genetics* 2005, **6**(6):507-512.
2. McManus MT, Sharp PA: **Gene silencing in mammals by small interfering RNAs.** *Nature reviews Genetics* 2002, **3**(10):737-747.
3. Gaj T, Gersbach CA, Barbas CF, 3rd: **ZFN, TALEN, and CRISPR/Cas-based methods for genome engineering.** *Trends Biotechnol* 2013, **31**(7):397-405.
4. Cong L, Ran FA, Cox D, Lin S, Barretto R, Habib N, Hsu PD, Wu X, Jiang W, Marraffini LA *et al*: **Multiplex genome engineering using CRISPR/Cas systems.** *Science* 2013, **339**(6121):819-823.
5. Miller JC, Tan S, Qiao G, Barlow KA, Wang J, Xia DF, Meng X, Paschon DE, Leung E, Hinkley SJ *et al*: **A TALE nuclease architecture for efficient genome editing.** *Nature biotechnology* 2011, **29**(2):143-148.
6. Urnov FD, Rebar EJ, Holmes MC, Zhang HS, Gregory PD: **Genome editing with engineered zinc finger nucleases.** *Nature reviews Genetics* 2010, **11**(9):636-646.
7. Hammond SM, Caudy AA, Hannon GJ: **Post-transcriptional gene silencing by double-stranded RNA.** *Nature reviews Genetics* 2001, **2**(2):110-119.
8. Banaszynski LA, Chen LC, Maynard-Smith LA, Ooi AGL, Wandless TJ: **A rapid, reversible, and tunable method to regulate protein function in living cells using synthetic small molecules.** *Cell* 2006, **126**(5):995-1004.
9. Bonger KM, Chen LC, Liu CW, Wandless TJ: **Small-molecule displacement of a cryptic degron causes conditional protein degradation.** *Nat Chem Biol* 2011, **7**(8):531-537.
10. Neklesa TK, Tae HS, Schneekloth AR, Stulberg MJ, Corson TW, Sundberg TB, Raina K, Holley SA, Crews CM: **Small-molecule hydrophobic tagging-induced degradation of HaloTag fusion proteins.** *Nat Chem Biol*

- 2011, **7**(8):538-543.
11. Buckley DL, Raina K, Darricarrere N, Hines J, Gustafson JL, Smith IE, Miah AH, Harling JD, Crews CM: **HaloPROTACS: Use of Small Molecule PROTACs to Induce Degradation of HaloTag Fusion Proteins.** *ACS Chem Biol* 2015, **10**(8):1831-1837.
  12. Nabet B, Roberts JM, Buckley DL, Paulk J, Dastjerdi S, Yang A, Leggett AL, Erb MA, Lawlor MA, Souza A *et al*: **The dTAG system for immediate and target-specific protein degradation.** *Nat Chem Biol* 2018, **14**(5):431-441.
  13. Natsume T, Kanemaki MT: **Conditional Degrons for Controlling Protein Expression at the Protein Level.** *Annu Rev Genet* 2017, **51**:83-102.
  14. Nishimura K, Fukagawa T, Takisawa H, Kakimoto T, Kanemaki M: **An auxin-based degron system for the rapid depletion of proteins in nonplant cells.** *Nature methods* 2009, **6**(12):917-922.
  15. Dharmasiri N, Dharmasiri S, Estelle M: **The F-box protein TIR1 is an auxin receptor.** *Nature* 2005, **435**(7041):441-445.
  16. Kepinski S, Leyser O: **The Arabidopsis F-box protein TIR1 is an auxin receptor.** *Nature* 2005, **435**(7041):446-451.
  17. Tan X, Calderon-Villalobos LI, Sharon M, Zheng C, Robinson CV, Estelle M, Zheng N: **Mechanism of auxin perception by the TIR1 ubiquitin ligase.** *Nature* 2007, **446**(7136):640-645.
  18. Holland AJ, Fachinetti D, Han JS, Cleveland DW: **Inducible, reversible system for the rapid and complete degradation of proteins in mammalian cells.** *Proceedings of the National Academy of Sciences of the United States of America* 2012, **109**(49):E3350-3357.
  19. Kanke M, Nishimura K, Kanemaki M, Kakimoto T, Takahashi TS, Nakagawa T, Masukata H: **Auxin-inducible protein depletion system in fission yeast.** *BMC Cell Biol* 2011, **12**:8.
  20. Zhang L, Ward JD, Cheng Z, Dernburg AF: **The auxin-inducible degradation (AID) system enables versatile conditional protein depletion in C. elegans.** *Development* 2015, **142**(24):4374-4384.
  21. Lambrus BG, Uetake Y, Clutario KM, Daggubati V, Snyder M, Sluder G, Holland AJ: **p53 protects against genome instability following centriole duplication failure.** *The Journal of cell biology* 2015, **210**(1):63-77.
  22. Iwasawa C, Narita M, Tamura H: **Regional and temporal regulation and role of somatostatin receptor subtypes in the mouse brain following systemic kainate-induced acute seizures.** *Neuroscience research* 2019.

23. Aurnhammer C, Haase M, Muether N, Hausl M, Rauschhuber C, Huber I, Nitschko H, Busch U, Sing A, Ehrhardt A *et al*: **Universal real-time PCR for the detection and quantification of adeno-associated virus serotype 2-derived inverted terminal repeat sequences.** *Hum Gene Ther Methods* 2012, **23**(1):18-28.
24. Seibenhener ML, Wooten MW: **Isolation and culture of hippocampal neurons from prenatal mice.** *J Vis Exp* 2012(65).
25. Natsume T, Kiyomitsu T, Saga Y, Kanemaki MT: **Rapid Protein Depletion in Human Cells by Auxin-Inducible Degron Tagging with Short Homology Donors.** *Cell Rep* 2016, **15**(1):210-218.

**A**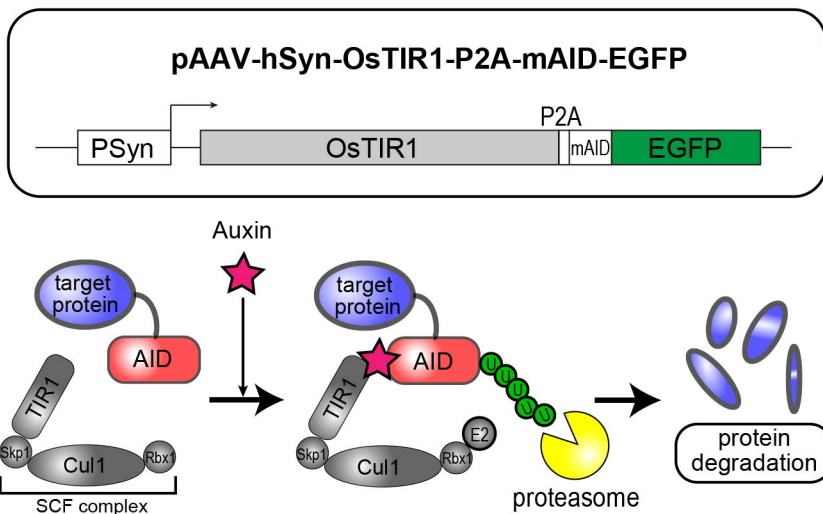**B**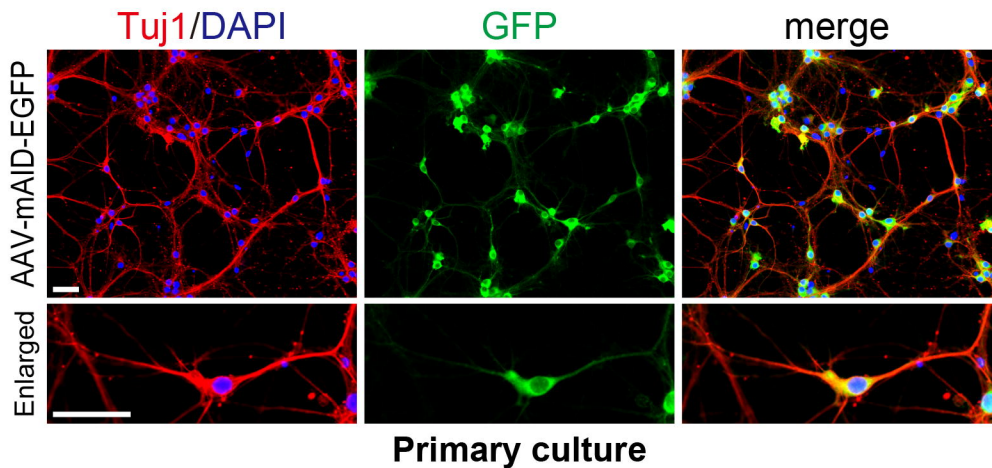

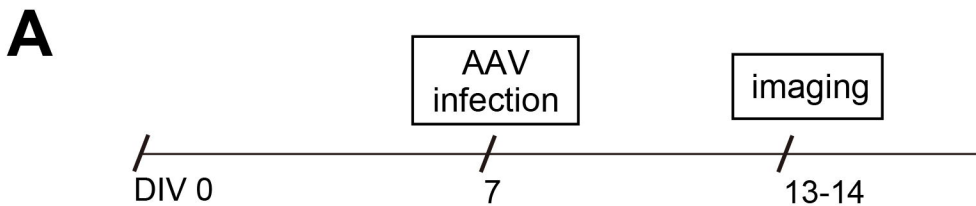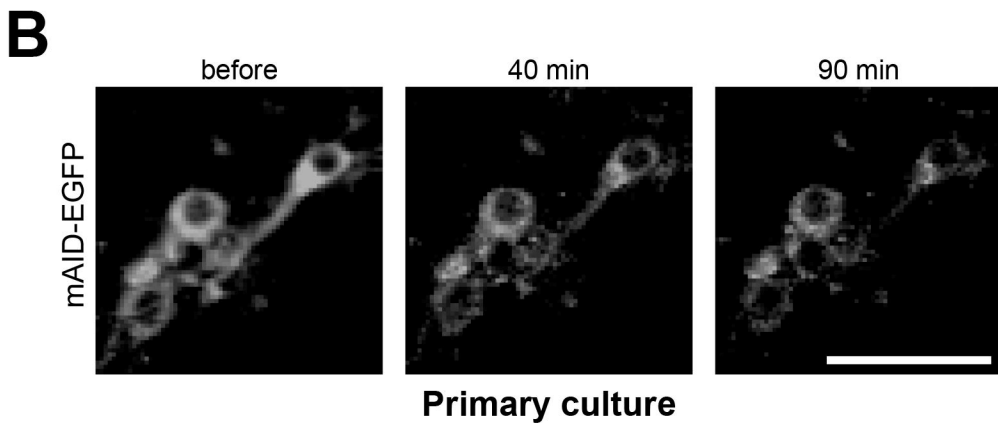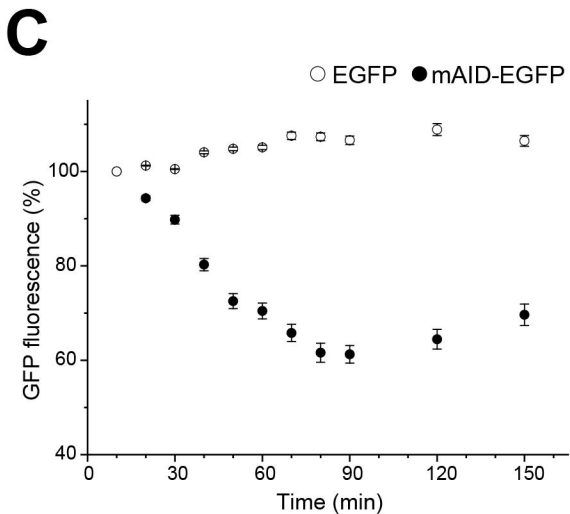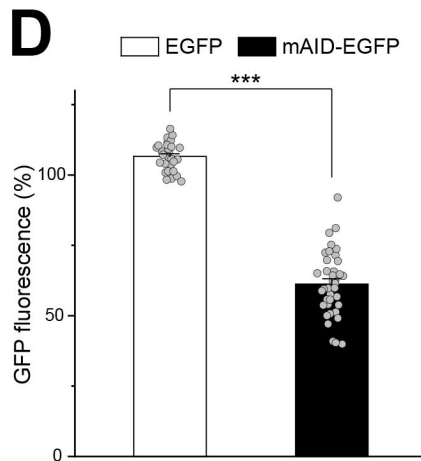



**A**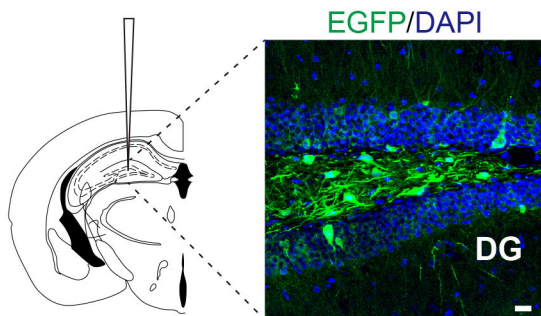**B**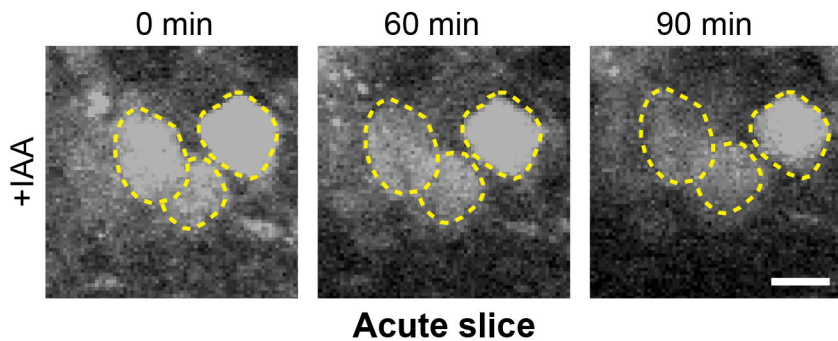**C**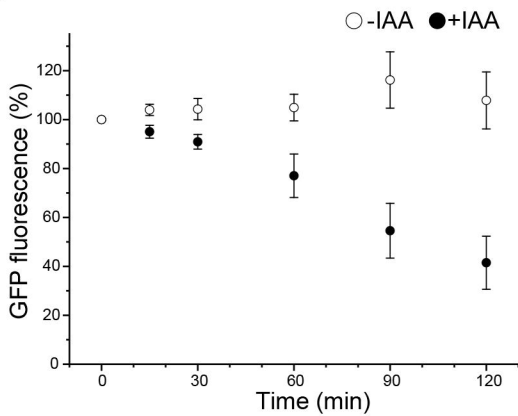**D**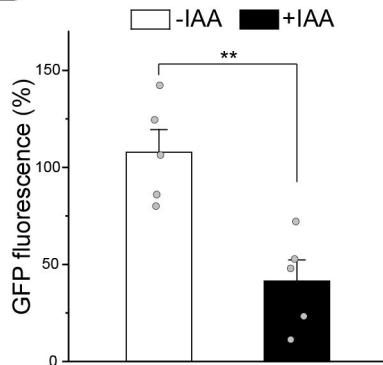

Source: https://www.biorxiv.org/content/10.1101/612119v1.full.pdf
